# Supplementary material for: Tannylated Calcium Carbonate Materials with Antacid, Anti-Inflammatory, and Antioxidant Effects
Source: MDPI journal article supplement (doi:10.3390/ijms22094614), 2021-04-28
Supplement: s1 [file s1]

## Supplementary Materials

### Tannylated Calcium Carbonate Materials with Antacid, Anti-inflammatory, and Antioxidant Effects

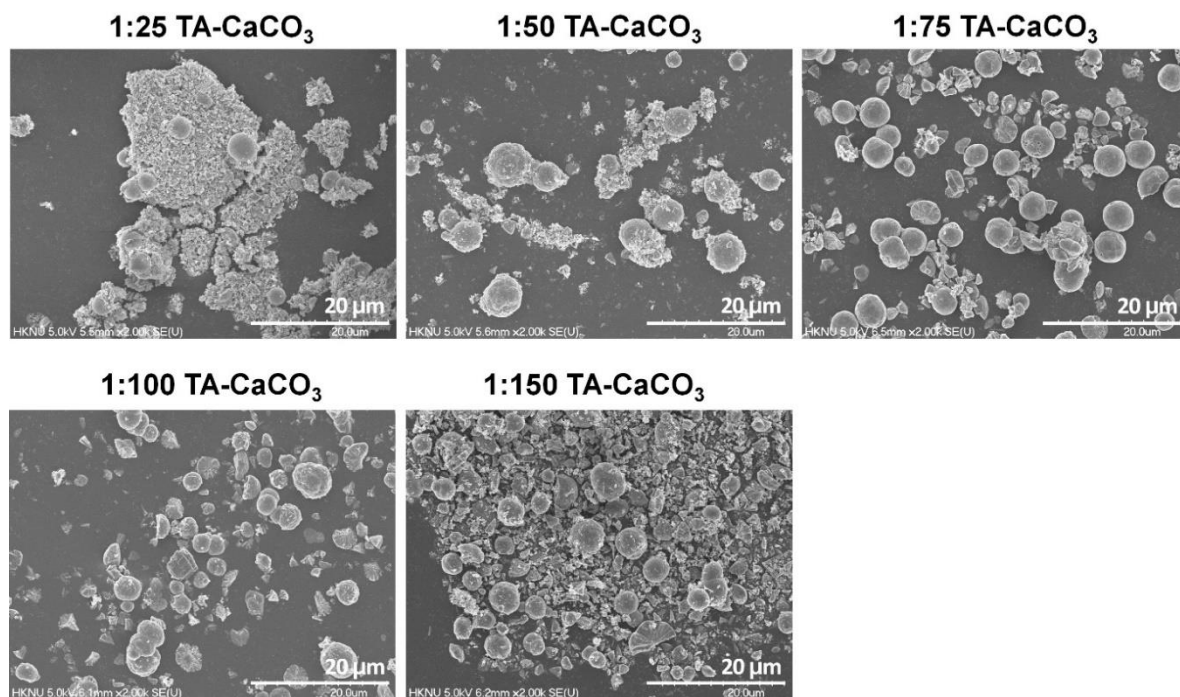

**Figure S1.** SEM images of the TA-CaCO<sub>3</sub> materials synthesized at different molar ratios of TA and CaCl<sub>2</sub>/Na<sub>2</sub>CO<sub>3</sub>.

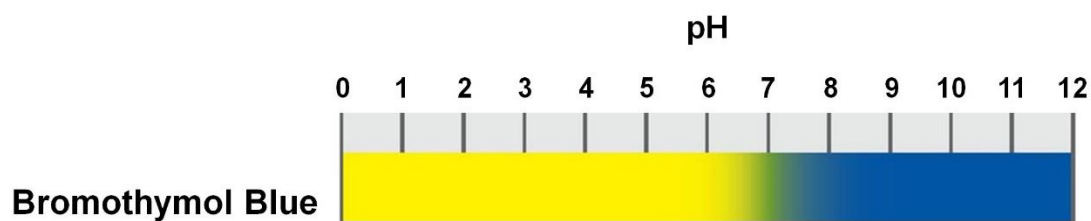

**Figure S2.** Color changes of BTB at different pH values.

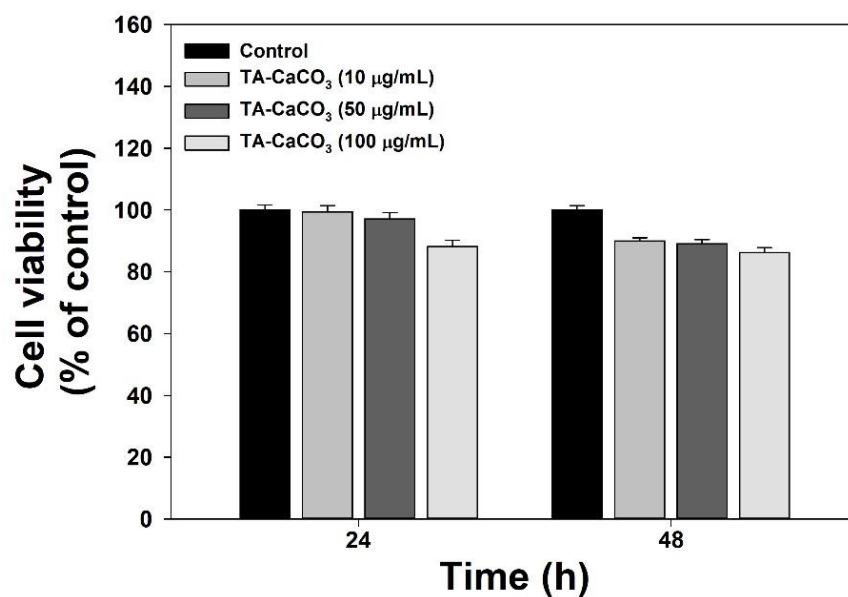

**Figure S3.** In vitro cytotoxicity of 1:75 TA-CaCO<sub>3</sub> against chondrocytes.

**Table S1.** RT-PCR primer sequences for genes related to pro-inflammatory factors.

| Genes         | Primer (forward) 5'→3'            | Primer (reverse)           |
|---------------|-----------------------------------|----------------------------|
| <i>COX-2</i>  | TAT CAG GTC ATC GGT GGA GA        | CGA AGC CAG ATG GTA GCA TA |
| <i>IL-1β</i>  | CCA CCT CCA GGG ACA GGA TA        | AAC ACG CAG GAC AGG TAC AG |
| <i>MMP-3</i>  | ACC TGT CCC TCC AGA ACC TG        | AAC TTC ATA TGC GGC ATC CA |
| <i>MMP-13</i> | GGT CCT TGG AGT GGT CAA GA        | AAG GAG CAT GGC GAC TTC TA |
| <i>IL-6</i>   | GCC TTC GGT CCA GTT GCC           | CTC AGG GCT GAG ATG CCG    |
| <i>TNF-α</i>  | GAC CCT CAC ACT CAG ATC ATC TTC T | TGC TAC GAC GTG GGC TAC G  |
